# Supplementary material
Source: PubMed Central journal article supplement (PMC5317277)
Supplement: NIHMS850048-supplement-1.pdf [file NIHMS850048-supplement-1.pdf]

**eTable1. INSPPIRE patient distribution per center**

| <b>Center</b>                                      | <b>TOTAL<br/>(n=301)</b> | <b>ARP<br/>(n=155)</b> | <b>CP<br/>(n=146)</b> |
|----------------------------------------------------|--------------------------|------------------------|-----------------------|
| Baylor Texas Children's, USA                       | 41                       | 22                     | 19                    |
| University of Minnesota, USA                       | 32                       | 1                      | 31                    |
| University of California at San Francisco, USA     | 30                       | 10                     | 20                    |
| University of Pittsburgh, USA                      | 29                       | 19                     | 10                    |
| Hospital for Sick Children, Toronto, Canada        | 24                       | 13                     | 11                    |
| UT Southwestern, USA                               | 23                       | 13                     | 10                    |
| Medical College of Wisconsin, USA                  | 21                       | 12                     | 9                     |
| University of Washington at Seattle, USA           | 18                       | 5                      | 13                    |
| University of Iowa, USA                            | 17                       | 11                     | 6                     |
| University of Utah, USA                            | 16                       | 14                     | 2                     |
| Nationwide Children's Hospital, USA                | 14                       | 8                      | 2                     |
| Hadassah Hebrew University Medical Center, Israel  | 11                       | 10                     | 1                     |
| Cincinnati Children's Hospital Medical Center, USA | 11                       | 7                      | 4                     |
| University of New South Wales, Australia           | 8                        | 5                      | 3                     |
| Montreal Children's, Canada                        | 6                        | 5                      | 1                     |

**eTable2: Association of ethnicity with genetic risk factors – Frequency (% of /n) with genotype by ethnicity**

| <b>Genotype</b>      | <b>Hispanic</b> | <b>Non-Hispanic</b> | <b>Genetic Risk Odds Ratio (95% CI)<br/>for Hispanic vs. Non-Hispanic</b> | <b>p-value</b> |
|----------------------|-----------------|---------------------|---------------------------------------------------------------------------|----------------|
| <b><i>PRSS1</i></b>  | 8/41 (20%)      | 47/138 (34%)        | 0.47 (0.20, 1.10)                                                         | 0.076          |
| <b><i>SPINK1</i></b> | 3/35 (9%)       | 30/128 (23%)        | 0.31 (0.09, 1.07)                                                         | 0.052          |
| <b><i>CFTR</i></b>   | 7/38 (19%)      | 42/139 (30%)        | 0.52 (0.21, 1.28)                                                         | 0.150          |
| <b><i>CTRC</i></b>   | 1/24 (4%)       | 7/84 (8%)           | 0.48 (0.06, 4.09)                                                         | 0.492          |

The differences in numbers between rows reflect available data for these parameters.

**eTable 3. Frequency (% of /n) with genotype by finding of pancreas divisum**

| <b>Genotype</b>      | <b>Pancreas divisum present</b> | <b>Pancreas divisum absent</b> | <b>Odds Ratio Pancreas Divisum (95% CI)</b> | <b>p-value</b> |
|----------------------|---------------------------------|--------------------------------|---------------------------------------------|----------------|
| <i><b>PRSS1</b></i>  | 3/22 (14%)                      | 59/165 (36%)                   | 0.28 (0.08, 0.99)                           | <b>0.038</b>   |
| <i><b>SPINK1</b></i> | 7/21 (33%)                      | 26/148 (18%)                   | 2.35 (0.72, 6.94)                           | 0.136          |
| <i><b>CFTR</b></i>   | 8/24 (33%)                      | 45/159 (28%)                   | 1.27 (0.51, 3.17)                           | 0.612          |
| <i><b>CTRC</b></i>   | 3/14 (21%)                      | 5/99 (5%)                      | 5.13 (0.69, 30.17)                          | 0.059          |

Statistically significant differences are shown in bold. The differences in total n numbers between rows reflect available data for these parameters.
